# Supplementary material for: From helical to planar chirality by on-surface chemistry
Source: Springer Nature journal article supplement (doi:10.1038/nchem.2662), 2016-11-21
Supplement: 41557_2017_BFnchem2662_MOESM4_ESM.mol [file 41557_2017_BFnchem2662_MOESM4_ESM.mol]

nchem.2662-compP1.mol
  ChemDraw11011615542D

 38 47  0  0  0  0  0  0  0  0999 V2000
   -0.8250    0.7145    0.0000 C   0  0  0  0  0  0  0  0  0  0  0  0
   -1.6500    0.7145    0.0000 C   0  0  0  0  0  0  0  0  0  0  0  0
   -1.6500   -0.7144    0.0000 C   0  0  0  0  0  0  0  0  0  0  0  0
   -2.0625    0.0000    0.0000 C   0  0  0  0  0  0  0  0  0  0  0  0
   -0.4125    1.4290    0.0000 C   0  0  0  0  0  0  0  0  0  0  0  0
   -0.8250    2.1434    0.0000 C   0  0  0  0  0  0  0  0  0  0  0  0
   -2.0625    1.4290    0.0000 C   0  0  0  0  0  0  0  0  0  0  0  0
   -1.6500    2.1434    0.0000 C   0  0  0  0  0  0  0  0  0  0  0  0
    0.4125    1.4290    0.0000 C   0  0  0  0  0  0  0  0  0  0  0  0
    0.8250    2.1434    0.0000 C   0  0  0  0  0  0  0  0  0  0  0  0
   -0.4125    2.8579    0.0000 C   0  0  0  0  0  0  0  0  0  0  0  0
    0.4125    2.8579    0.0000 C   0  0  0  0  0  0  0  0  0  0  0  0
   -2.8875    1.4290    0.0000 C   0  0  0  0  0  0  0  0  0  0  0  0
   -3.3000    2.1434    0.0000 C   0  0  0  0  0  0  0  0  0  0  0  0
   -2.0625    2.8579    0.0000 C   0  0  0  0  0  0  0  0  0  0  0  0
   -2.8875    2.8579    0.0000 C   0  0  0  0  0  0  0  0  0  0  0  0
    1.6500    2.1434    0.0000 C   0  0  0  0  0  0  0  0  0  0  0  0
    2.0625    2.8579    0.0000 C   0  0  0  0  0  0  0  0  0  0  0  0
    2.0625    1.4290    0.0000 C   0  0  0  0  0  0  0  0  0  0  0  0
    2.8875    2.8579    0.0000 C   0  0  0  0  0  0  0  0  0  0  0  0
    2.8875    1.4290    0.0000 C   0  0  0  0  0  0  0  0  0  0  0  0
    3.3000    2.1434    0.0000 C   0  0  0  0  0  0  0  0  0  0  0  0
    0.8250    0.7145    0.0000 C   0  0  0  0  0  0  0  0  0  0  0  0
    1.6500    0.7145    0.0000 C   0  0  0  0  0  0  0  0  0  0  0  0
    0.4125    0.0000    0.0000 C   0  0  0  0  0  0  0  0  0  0  0  0
    0.8250   -0.7144    0.0000 C   0  0  0  0  0  0  0  0  0  0  0  0
    2.0625    0.0000    0.0000 C   0  0  0  0  0  0  0  0  0  0  0  0
    1.6500   -0.7144    0.0000 C   0  0  0  0  0  0  0  0  0  0  0  0
   -0.4125    0.0000    0.0000 C   0  0  0  0  0  0  0  0  0  0  0  0
   -0.8250   -0.7144    0.0000 C   0  0  0  0  0  0  0  0  0  0  0  0
    0.4125   -1.4289    0.0000 C   0  0  0  0  0  0  0  0  0  0  0  0
   -0.4125   -1.4289    0.0000 C   0  0  0  0  0  0  0  0  0  0  0  0
   -2.0625   -1.4289    0.0000 C   0  0  0  0  0  0  0  0  0  0  0  0
   -2.8875   -1.4289    0.0000 C   0  0  0  0  0  0  0  0  0  0  0  0
   -1.6500   -2.1434    0.0000 C   0  0  0  0  0  0  0  0  0  0  0  0
   -3.3000   -2.1435    0.0000 C   0  0  0  0  0  0  0  0  0  0  0  0
   -2.0625   -2.8579    0.0000 C   0  0  0  0  0  0  0  0  0  0  0  0
   -2.8875   -2.8579    0.0000 C   0  0  0  0  0  0  0  0  0  0  0  0
  4  2  1  0      
  4  3  2  0      
  5  1  1  0      
  2  1  2  0      
  7  2  1  0      
  8  6  1  0      
  9  5  1  0      
  6  5  2  0      
 11  6  1  0      
 12 10  1  0      
 12 11  2  0      
 13  7  1  0      
  8  7  2  0      
 14 13  2  0      
 15  8  1  0      
 16 14  1  0      
 16 15  2  0      
 18 17  1  0      
 20 18  2  0      
 21 19  1  0      
 22 20  1  0      
 22 21  2  0      
 23  9  1  0      
 10  9  2  0      
 17 10  1  0      
 19 24  1  0      
 19 17  2  0      
 25 23  1  0      
 24 23  2  0      
 27 24  1  0      
 28 26  1  0      
 28 27  2  0      
 29 25  1  0      
 26 25  2  0      
 30 29  2  0      
 31 26  1  0      
 32 30  1  0      
 32 31  2  0      
 30  3  1  0      
 29  1  1  0      
 34 33  1  0      
 35 33  2  0      
 36 34  2  0      
 37 35  1  0      
 38 36  1  0      
 38 37  2  0      
  3 33  1  0      
M  END
